# Supplementary material for: Circulating Tumour Cell Release after Cement Augmentation of Vertebral Metastases
Source: PubMed Central journal article supplement (PMC5543076; doi:10.1038/s41598-017-07649-z), 2017-08-03
Supplement: 41598_2017_7649_MOESM1_ESM.pdf [file 41598_2017_7649_MOESM1_ESM.pdf]

# **Circulating Tumour Cell Release after Cement Augmentation of Vertebral Metastases**

Malte Mohme<sup>1\*</sup>, Sabine Riethdorf<sup>2</sup>, Marc Dreimann<sup>3</sup>, Stefan Werner<sup>2</sup>, Cecile L. Maire<sup>1</sup>,  
Simon A. Joosse<sup>2</sup>, Frederic Bludau<sup>4</sup>, Volkmar Mueller<sup>5</sup>, Rui P. L. Neves<sup>6</sup>, Nikolas H.  
Stoecklein<sup>6</sup>, Katrin Lamszus<sup>1</sup>, Manfred Westphal<sup>1</sup>, Klaus Pantel<sup>2</sup>,  
Harriet Wikman<sup>2‡</sup>, Sven O. Eicker<sup>1‡</sup>

<sup>1</sup> Department of Neurosurgery, University Medical Centre, Hamburg-Eppendorf, Germany

<sup>2</sup> Department of Tumour Biology, University Medical Centre Hamburg-Eppendorf, Germany

<sup>3</sup> Department of Trauma-, Hand- and Reconstructive Surgery, University Medical Centre Hamburg-Eppendorf, Germany

<sup>4</sup> Department for Trauma Surgery, University Medical Centre Mannheim, University of Heidelberg, Germany

<sup>5</sup> Department of Gynecology, University Medical Centre Hamburg-Eppendorf, Hamburg, Germany

<sup>6</sup> Department of General, Visceral and Pediatric Surgery, University Hospital and Medical Faculty of the Heinrich-Heine University Dusseldorf, Dusseldorf, Germany

‡ these authors contributed equally

\* corresponding author

## **Corresponding Author:**

Malte Mohme, M.D.

Department of Neurosurgery

University Hospital Hamburg-Eppendorf

Martinistr. 52, 20246 Hamburg, Germany

Tel.: +49 (0) 40 7410-0

Fax: +49 (0) 40 7410-58121

m.mohme@uke.de

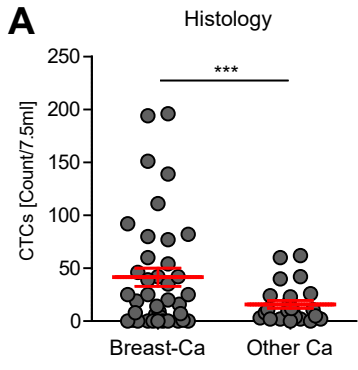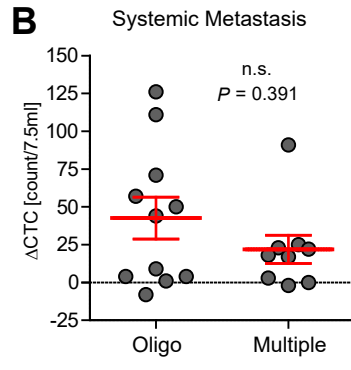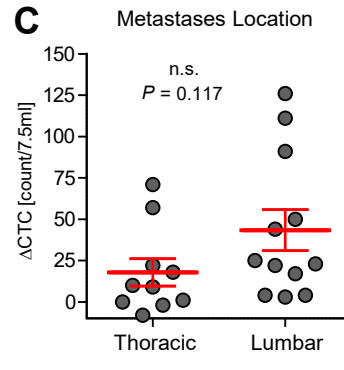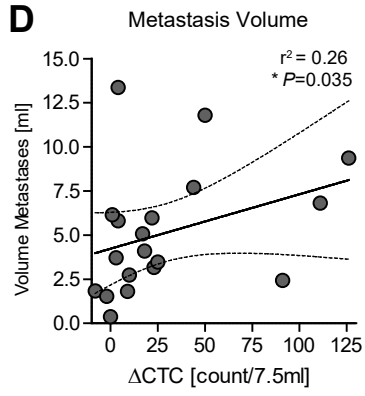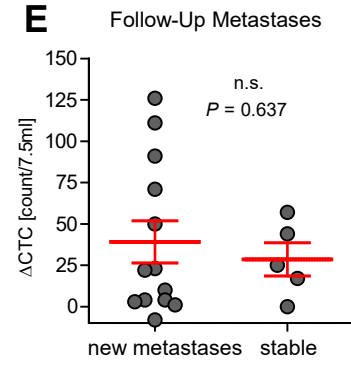

### Supplementary Figure 1

A) CTC counts (CTC/7.5ml blood) of all three measurements (preOP, 20min, 3-5 days postOP) stratified by Histology. B) Increase of CTC counts ( $CTC_{preOP} - CTC_{20min} = \Delta CTC/7.5ml$ ) compared between patients with only one organ system affected by metastasis (Oligo) versus patients with metastasis in multiple organ systems (Multiple). C) Comparison of CTC release ( $\Delta CTC$ ) by location of metastasis within the spinal column. Bars and error depict mean and standard error (SE). D) Correlative comparison of CTC increase ( $\Delta CTC$ ) with metastasis volume [ml] with linear regression curve fit and 95% CI analysed by Spearman correlation. E) Comparison of CTC release ( $\Delta CTC$ ) by development of new metastasis during follow-up.

**Supplemental Table 1.** Breast-Ca Patient Characteristics

| No. | Primary Tumor | Follow-up from VP [days] | death | Pathology Primary Tumor |      |      |      |      |      |      | Pathology Vertebral Metastasis |      |      |       | Metastatic spread* | Location of other Metastases  |
|-----|---------------|--------------------------|-------|-------------------------|------|------|------|------|------|------|--------------------------------|------|------|-------|--------------------|-------------------------------|
|     |               |                          |       | ER                      | PR   | Her2 | T    | N    | M    | G    | ER                             | PR   | Her2 | GATA3 |                    |                               |
| 1   | Breast-Ca     | 812                      | yes   | +                       | +    | -    | pT1c | pN1  | M0   | 2    | +                              | -    | -    | +     | oligo              | bone                          |
| 2   | Breast-Ca     | 710                      | no    | +                       | +    | -    | pT2m | pN2a | M0   | 3    | +                              | -    | -    | +     | oligo              | bone                          |
| 3   | Breast-Ca     | 338                      | yes   | -                       | -    | n.a. | pT1c | pN1  | M0   | n.a. | +                              | -    | -    | n.a.  | multiple           | liver, lymph nodes            |
| 4   | Breast-Ca     | n.a.                     | n.a.  | +                       | +    | -    | pT1c | pN1  | M0   | 2    | n.a.                           | n.a. | n.a. | n.a.  | multiple           | bone, stomach                 |
| 5   | Breast-Ca     | 446                      | no    | -                       | -    | n.a. | pT2  | pN0  | M0   | 2    | n.a.                           | n.a. | n.a. | n.a.  | multiple           | bone, lung                    |
| 6   | Breast-Ca     | n.a.                     | n.a.  | n.a.                    | n.a. | n.a. | n.a. | n.a. | n.a. | n.a. | +                              | -    | -    | +     | oligo              | bone                          |
| 7   | Breast-Ca     | 412                      | no    | +                       | +    | n.a. | pT1c | pN1  | M0   | 3    | n.a.                           | n.a. | n.a. | n.a.  | oligo              | bone                          |
| 8   | Breast-Ca     | 250                      | no    | +                       | +    | -    | pT2  | pN0  | M0   | 2    | +                              | +    | -    | +     | oligo              | bone                          |
| 9   | Breast-Ca     | 178                      | no    | +                       | +    | -    | pT3  | pN2a | M0   | 2    | n.a.                           | n.a. | n.a. | n.a.  | oligo              | bone                          |
| 10  | Breast-Ca     | 301                      | no    | -                       | -    | +    | cT1  | cN0  | cM0  | 2    | n.a.                           | n.a. | -    | +     | oligo              | bone                          |
| 11  | Breast-Ca     | 303                      | no    | +                       | +    | -    | pT1c | pN2a | M0   | 2    | n.a.                           | n.a. | n.a. | +     | multiple           | bone                          |
| 12  | Breast-Ca     | 174                      | no    | n.a.                    | n.a. | n.a. | n.a. | n.a. | n.a. | n.a. | -                              | -    | -    | +     | oligo              | bone                          |
| 13  | Breast-Ca     | 147                      | no    | +                       | +    | -    | pT3  | pN1a | pM1  | 2    | n.a.                           | n.a. | n.a. | n.a.  | multiple           | bone, liver, lung, lymph node |

\* Oligo = only one organ system affected

**Supplemental Table 1:** Characteristics of breast-cancer patients. ER: estrogen receptor, PR: progesterone receptor, TNM stages, n.a.: not available, oligo: only one organ system affected

**Supplemental Table 2.** Other Tumor Entities – Patient Characteristics

| No. | Primary Tumor | Follow-up from VP [days] | death | Pathology Primary Tumor |      |      |      | Pathology Vertebral Metastasis |         |      |       | Metastatic spread* | Location of other Metastases |                         |
|-----|---------------|--------------------------|-------|-------------------------|------|------|------|--------------------------------|---------|------|-------|--------------------|------------------------------|-------------------------|
|     |               |                          |       | Histology               | T    | N    | M    | G                              | AE1/AE3 | CK7  | CK5/6 |                    |                              | TTF-1                   |
| 14  | NSCLC         | 239                      | no    | Adenocarcinoma          | cT4  | cN2  | cM1  | n.a.                           | +       | +    | -     | +                  | multiple                     | bone, lung, liver       |
| 15  | NSCLC         | 13                       | yes   | Adenocarcinoma          | n.a. | n.a. | n.a. | n.a.                           | +       | +    | -     | +                  | oligo                        | bone                    |
| 16  | NSCLC         | 449                      | no    | Adenocarcinoma          | n.a. | n.a. | n.a. | n.a.                           | +       | +    | -     | +                  | oligo                        | bone                    |
| 17  | NSCLC         | 374                      | no    | Adenocarcinoma          | cT2  | cN2  | pM1  | n.a.                           | n.a.    | n.a. | n.a.  | +                  | oligo                        | bone                    |
| 18  | NSCLC         | 118                      | no    | Adenocarcinoma          | cT1a | cN0  | pM1b | n.a.                           | +       | +    | -     | -                  | oligo                        | bone                    |
| 19  | Colorectal-Ca | 80                       | n.a.  | -                       | pT4a | pN2a | M1   | 3                              | n.a.    | n.a. | n.a.  | n.a.               | multiple                     | liver, lung, lymph node |
| 20  | Urothel-Ca    | 132                      | n.a.  | -                       | cT4  | cN2  | cM1  | n.a.                           | n.a.    | n.a. | +     | n.a.               | multiple                     | bone, lung, lymph node  |
| 21  | Prostate-Ca   | 577                      | no    | -                       | n.a. | n.a. | n.a. | n.a.                           | +       | -    | n.a.  | -                  | multiple                     | bone                    |

\* Oligo = only one organ system affected

**Supplemental Table 2:** Characteristics of non-breast-cancer patients. NSCLC: non-small cell lung-cancer, TNM stages, n.a.: not available, oligo: only one organ system affected
